# Supplementary material for: Luminescence properties of Gd(CO3)OH spherical particles with prospects for CL microscopic analysis and multi-color displays
Source: Royal Society of Chemistry journal article supplement (doi:10.1039/d2qm00214k), 2022-01-01
Supplement: d2qm00214k1.pdf [file d2qm00214k1.pdf]

## Supporting Information

### **Structural calculations of Gd(CO<sub>3</sub>)OH luminescent nanospheres with the prospect for CL microscopic analysis and multi-color displays**

Junyi Li,<sup>[a]</sup> Mimi Li,<sup>[a,b]</sup> Zihan Zhang,<sup>[a]</sup> Zhicheng Zheng,<sup>[a]</sup> Gen Chen,<sup>[a]</sup> Hao Wan,<sup>[b]</sup> Ying Zhang,<sup>[b]</sup> Xiaohe Liu,<sup>\*[a,b]</sup> and Renzhi Ma<sup>\*[c]</sup>

[a] School of Materials Science and Engineering, Central South University, Changsha, Hunan 410083, P. R. China

E-mail: liuxh@csu.edu.cn

[b] School of Chemical Engineering, Zhengzhou University, Zhengzhou 450001, P.R. China

E-mail: liuxiaohe@zzu.edu.cn

[c] International Center for Materials Nanoarchitectonics (WPI-MANA), National Institute for Materials Science (NIMS), Namiki 1-1, Tsukuba, Ibaraki 305-0044, Japan

E-mail: MA.Renzhi@nims.go.jp'

### **Measurement and characterizations**

The phase identification was determined by X-ray diffraction (XRD, RIGAKU Inc., Japan, D/max2550 VB+) with Cu K $\alpha$  radiation. The Thermogravimetric (TG) data were performed on a TGA-8120 instrument (RIGAKU Inc., Japan) in air from 35 to 900°C. The morphology and elemental information of the samples were measured by scanning electron microscope (SEM, FEI Helios Nanolab 600i) and transmission electron microscope (TEM, Titan G2 60-300). The DFT

calculation of the electronic band structure was conducted by using the Vienna ab initio simulation package (VASP) software. The generalized gradient approximation (GGA) were executed, which was expressed by Perdew-Burke-Ernzerhof (PBE).

The diffuse reflectance spectrum (DRS) was tested on the UV-VIS spectrophotometer (SHIMADZU, UV-2600) with  $\text{BaSO}_4$  as the white background reference. The PL emission and excitation spectra were obtained by a FLS-920T fluorescence spectrophotometer with a 450 W Xe source. The luminescent decay curves were measured by the same system with the light source switched to microsecond flashlamp. The monitored excitation and emission wavelength were fixed at 380nm and 542nm respectively. The CL spectra were carried out by the Mp-Micro-S instrument (Horiba Jobin Yvon) with scanning electron microscopy (SEM, S-340, Hitachi, Japan).

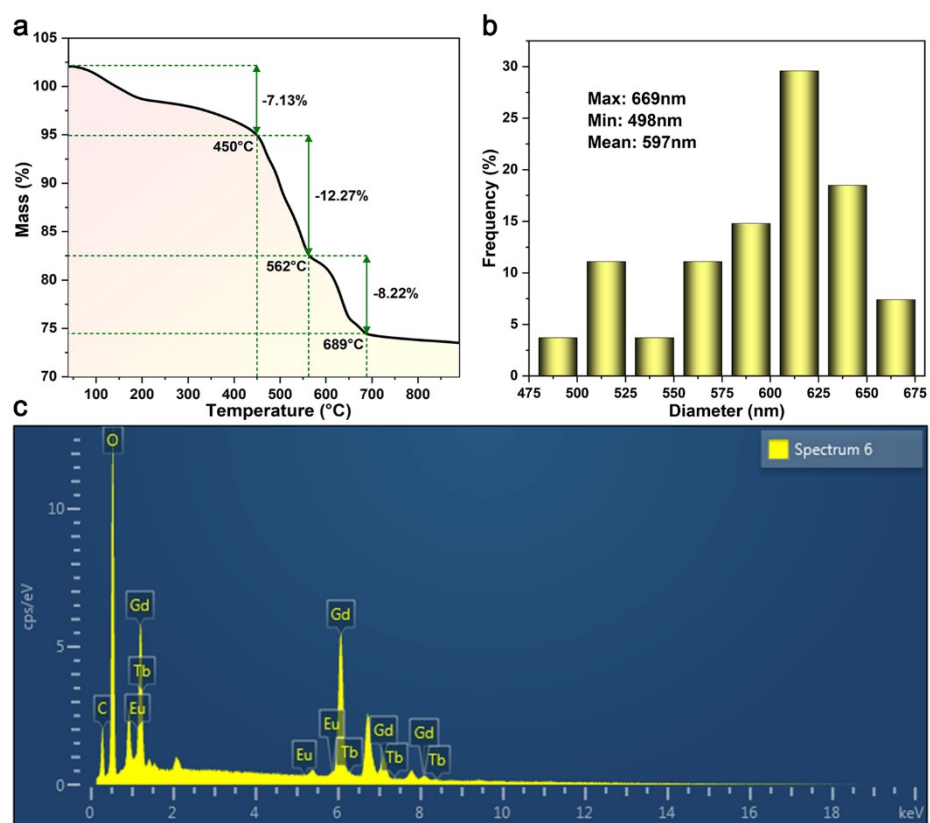

**Figure S1** **a** The TG curve of  $\text{Gd}(\text{CO}_3)\text{OH}$ . **b** The frequency counts b and EDX spectrum **c** of the typical sample (3, 1)

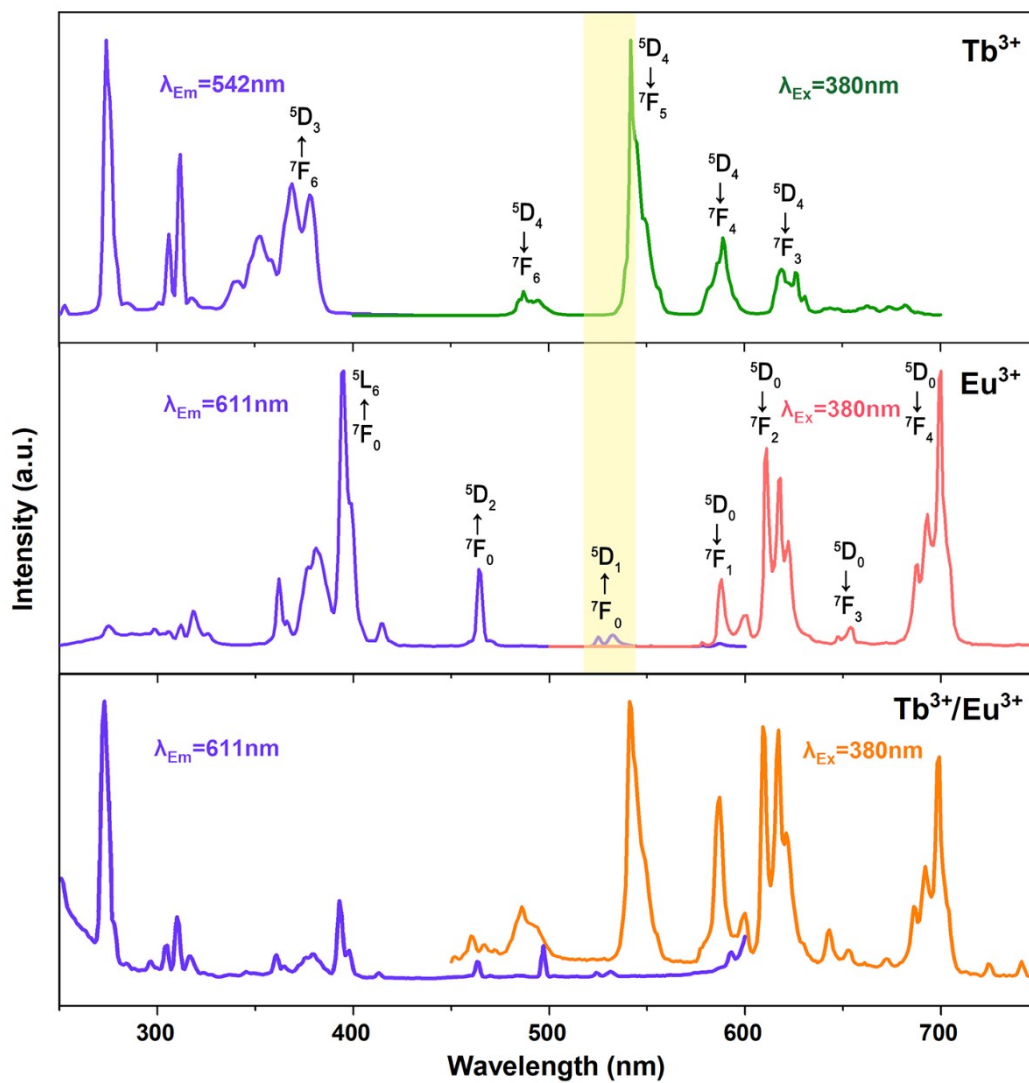

**Figure S2** The PL excitation and emission spectra of the single and co-doped samples.

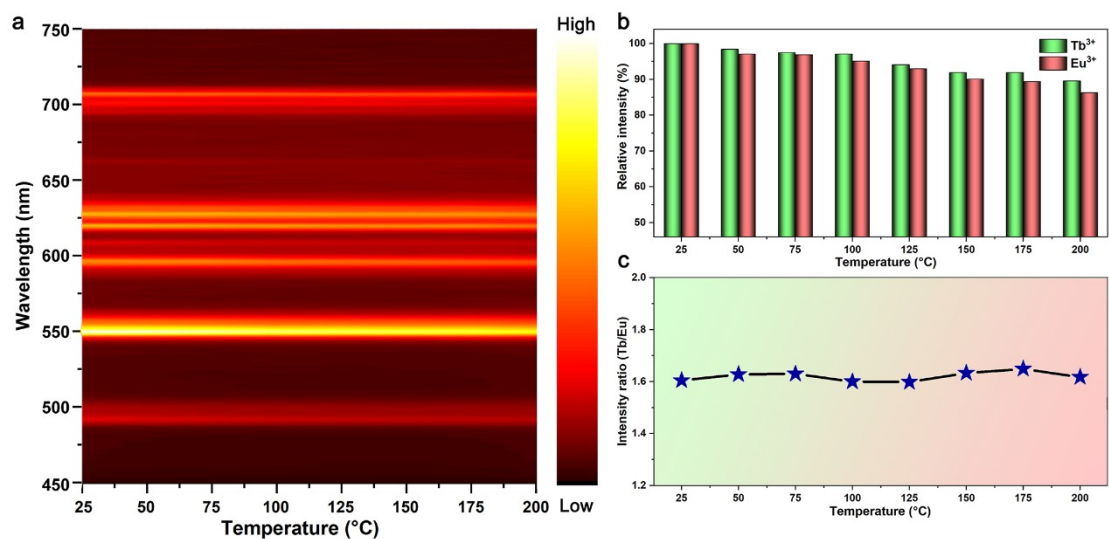

**Figure S3 a** The 2D temperature-dependent emission spectra of Gd(CO<sub>3</sub>)OH: Tb<sup>3+</sup>, Eu<sup>3+</sup>(typical sample (3, 1)). **b** The relative intensities of Tb<sup>3+</sup>, Eu<sup>3+</sup> at increasing temperature. **c** The intensity ratio of Tb<sup>3+</sup>/Eu<sup>3+</sup> at increasing temperature.

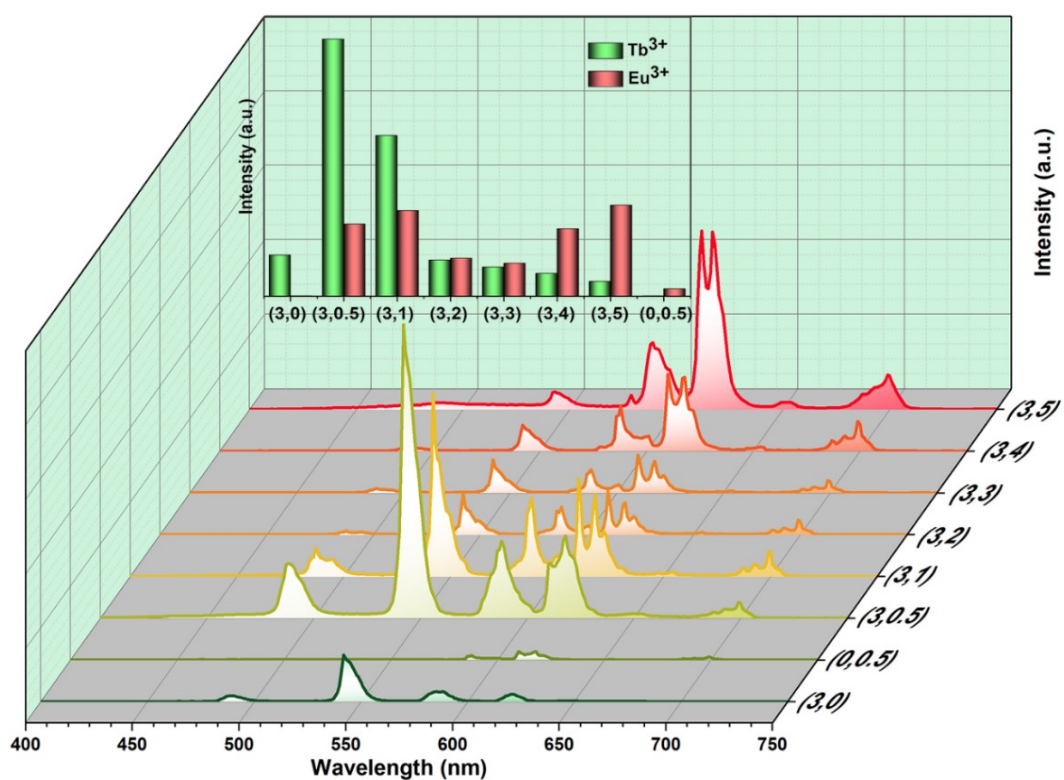

**Figure S4** The original PL spectra of the series sample. The inset showed the intensities of Tb<sup>3+</sup> and Eu<sup>3+</sup>.

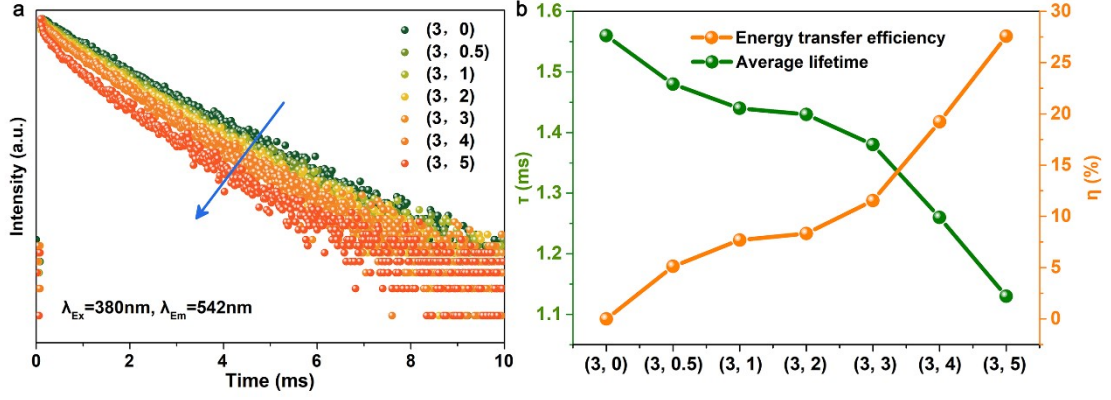

**Figure S5 a** The luminescence decay curves of the series sample. **b** The calculated average lifetime and energy transfer efficiency.

The luminescence decay curves of  $\text{Tb}^{3+}$  with the concentration of  $\text{Eu}^{3+}$  from 0% to 5% were tested in Figure S5a, in which gradually decreased lifetimes could be clearly viewed, indicating the energy loss of  $\text{Tb}^{3+}$  with the raise of  $\text{Eu}^{3+}$  content. The average lifetime  $\tau$  of each sample could be conveniently calculated by the integral formula<sup>1</sup>:

$$\tau = \frac{\int_0^\infty I_D(t) t dt}{\int_0^\infty I_D(t) dt} \quad (1)$$

and converted to the energy transfer efficiency  $\eta_t$  by the formula<sup>2</sup>:

$$\eta_t = 1 - \frac{\tau}{\tau_0} \quad (2)$$

The results were plotted in Figure S5b. The average lifetime decreased from 1.56 to 1.13 ms, while the energy transfer efficiency reached the maximum of 27.56%. After logarithmic transformation,  $\log[\ln(I_0/I)]$  is linear correlated to  $\log(t)$

with a slope of 3/m. Hence the original decay curves were transformed and linear fitted in Figure 3e.

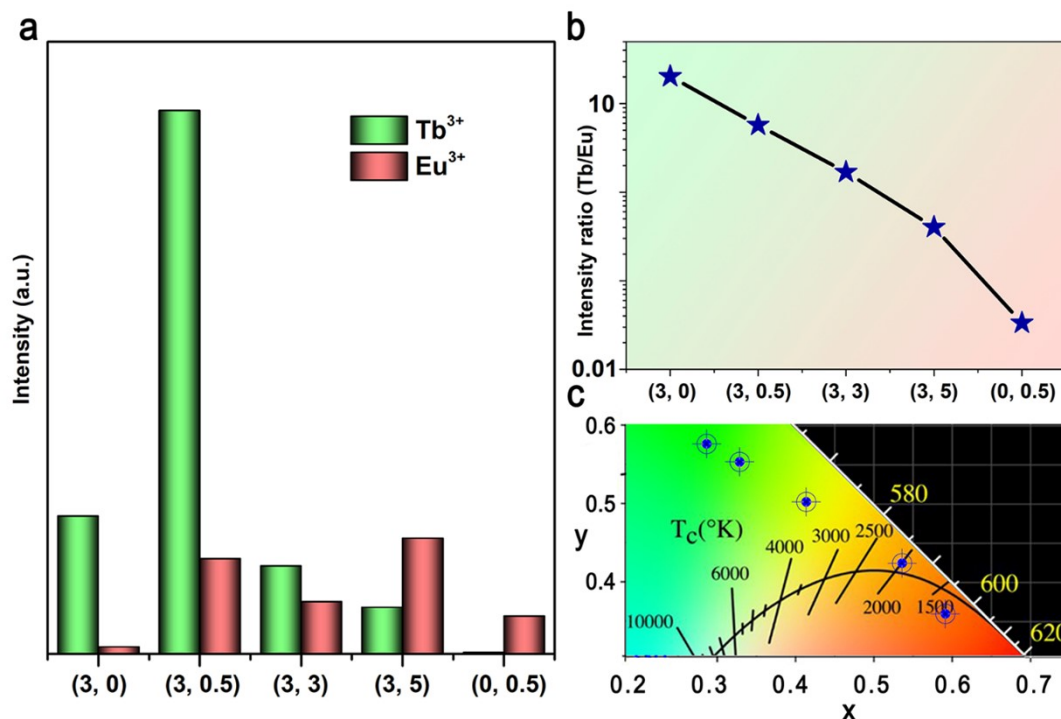

**Figure S6** The relative luminescent intensity **a**, ratio **b** and chromaticity coordinates **c** of the selected series samples under electron beam radiation.

**Table S1** Selected bond length of  $\text{Gd}(\text{CO}_3)\text{OH}$ .

| Bonds  | Length (Å) | Bonds | Length (Å) |
|--------|------------|-------|------------|
| Gd1-O1 | 2.56188(7) | C1-O1 | 1.24956(3) |
| Gd1-O1 | 2.62930(6) | C1-O3 | 1.35029(3) |
| Gd1-O2 | 2.37638(6) | H1-O1 | 1.84146(5) |
| Gd1-O2 | 2.44121(6) | H1-O2 | 1.51277(4) |
| Gd1-O3 | 2.47349(8) | H1-O2 | 1.68764(4) |



**Table S2** Element percentage of the sample (3, 1).

| Element | Weight % | Atomic % |
|---------|----------|----------|
| Gd      | 47.70    | 8.23     |
| C       | 11.86    | 26.77    |
| O       | 38.12    | 64.60    |
| Tb      | 1.56     | 0.27     |
| Eu      | 0.76     | 0.14     |

**References:**

[1] M. Jiao, N. Guo, W. Lü, Y. Jia, W. Lv, Q. Zhao, B. Shao, H. You, Tunable blue-green-emitting  $\text{Ba}_3\text{LaNa}(\text{PO}_4)_3\text{F}:\text{Eu}^{2+}, \text{Tb}^{3+}$  phosphor with energy transfer for near-UV white LEDs, *Inorg. Chem.*, 2013, **52**, 10340-10346.

[2] T. Zhou, L. Mei, Y. Zhang, L. Liao, H. Liu, Q. Guo, Color-tunable luminescence properties and energy transfer of  $\text{Tb}^{3+}/\text{Sm}^{3+}$  co-doped  $\text{Ca}_9\text{La}(\text{PO}_4)_5(\text{SiO}_4)\text{F}_2$  phosphors, *Opt. Laser Technol.*, 2019, **111**, 191-195.
